# Supplementary material
Source: publisher site journal article supplement (https://www.dovepress.com/article/542647)
Supplement: Supplementary file 1 [file 542647%20Revised%20Supplementary%20Material.docx]

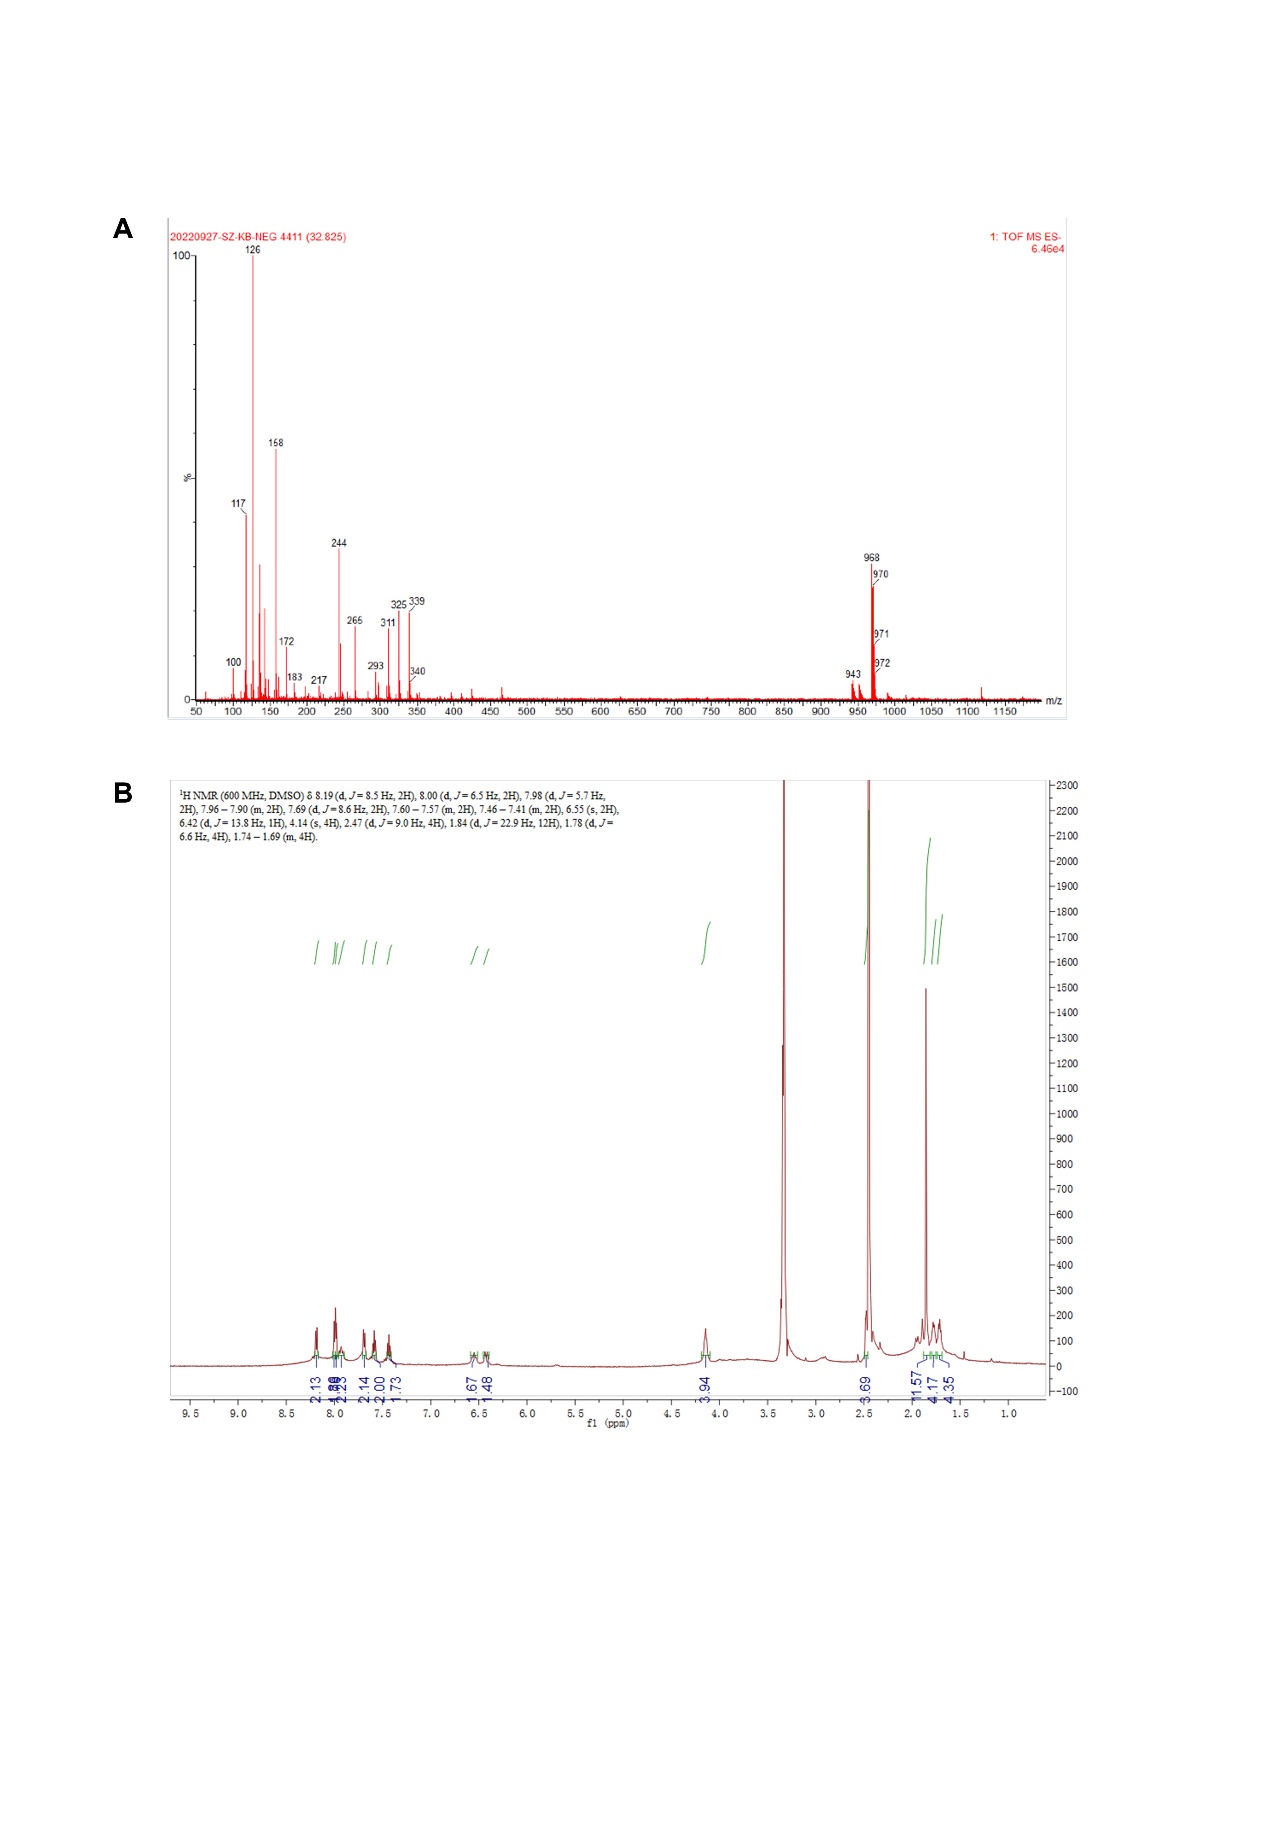


**Figure S1. Characterization of the conjugate (ICG-CDDP) by mass spectrometry (A) and 1H-NMR (B).**


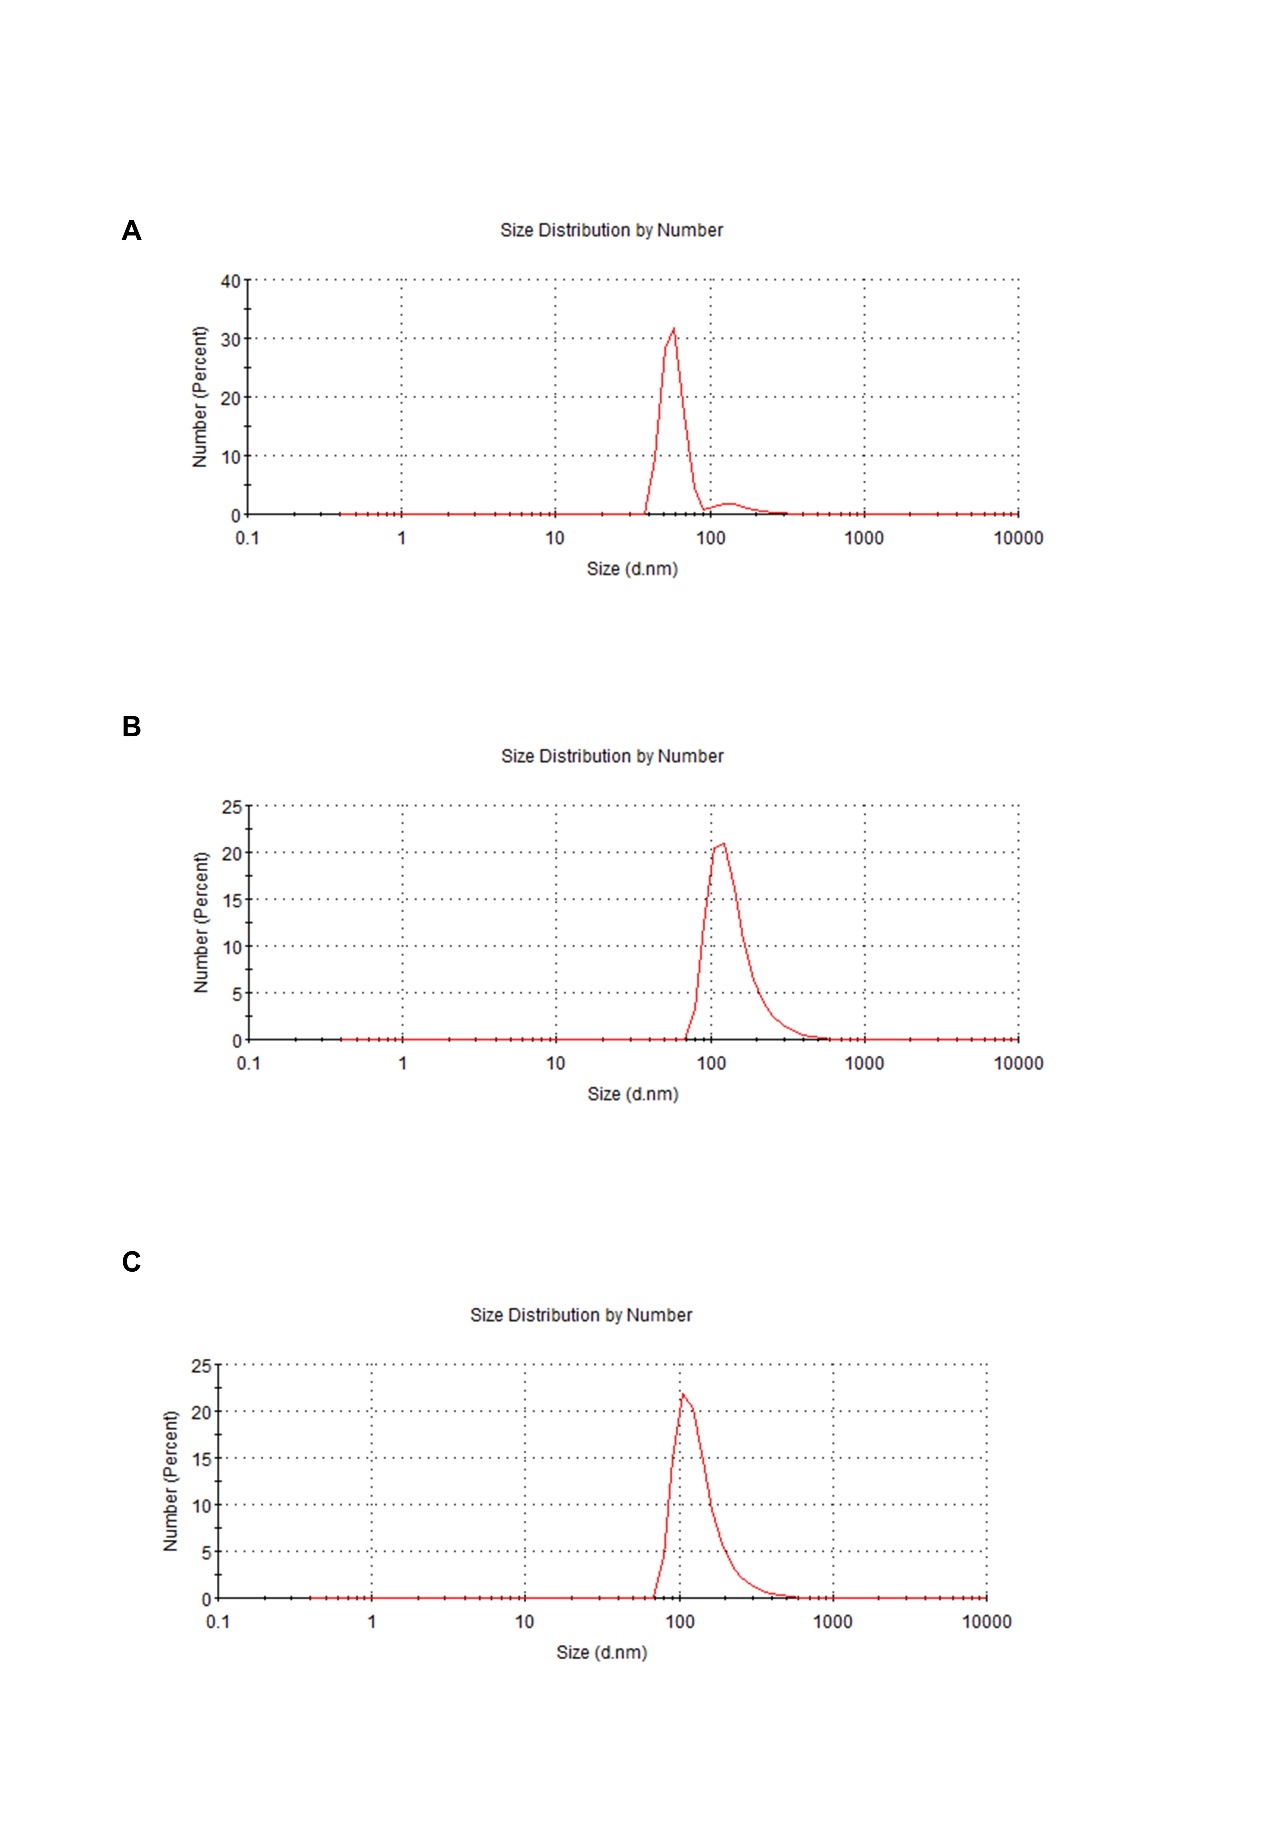


**Figure S2. Size distributions of MSN-NH2 (A), HMs (B), and ICG-CDDP@HMs (C).**


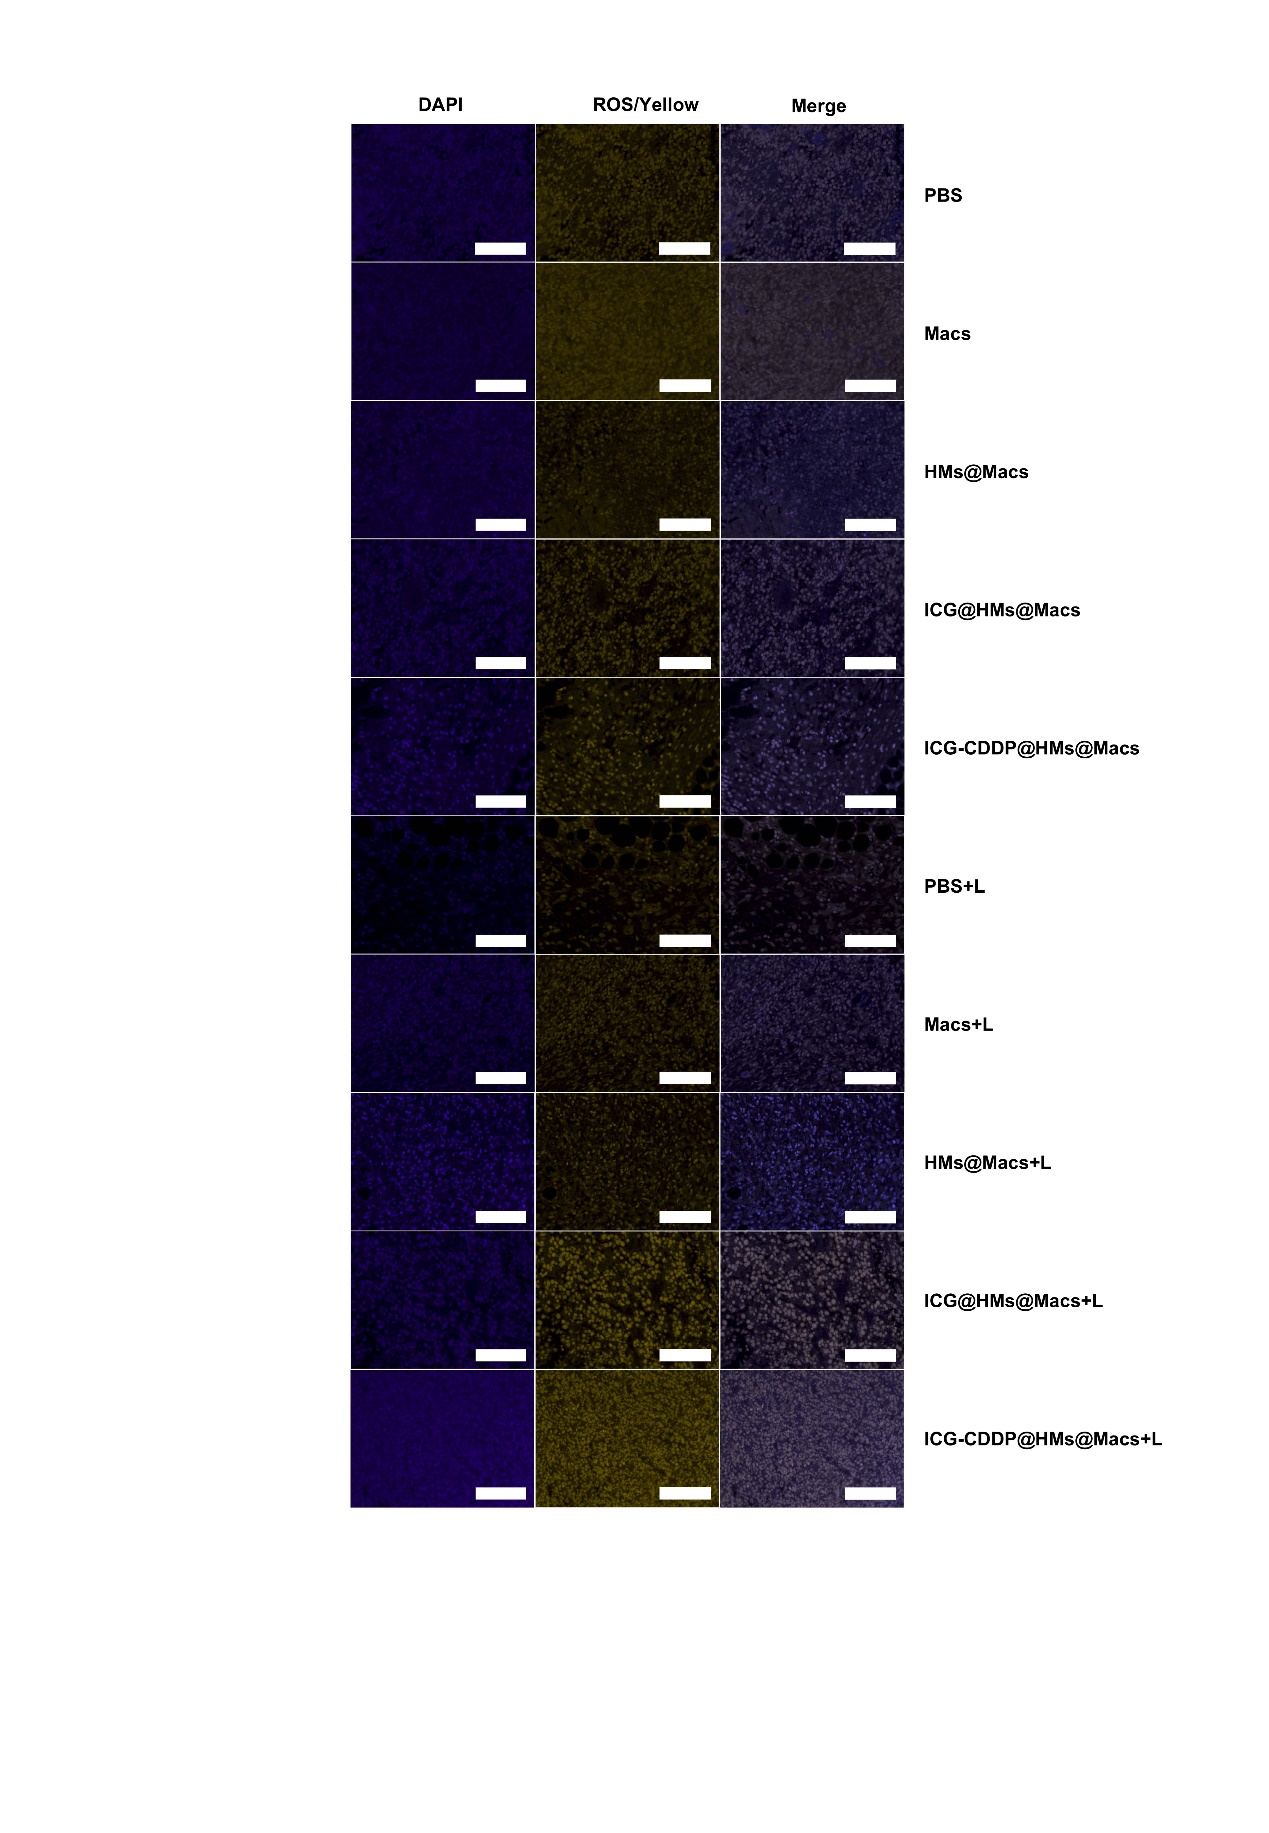


**Figure S3.** **Microscopy images of DHE (yellow)-stained tumor tissues from mice that received different treatments. The nuclei were stained with DAPI (blue). Scale bar, 100 μm**.
